# Supplementary material
Source: publisher figshare collection journal article supplement (https://geolsoc.figshare.com/ndownloader/files/16349957)
Supplement: Supplementary file 1 [file 16349957]

## Sheet: Foglio1
Table S2. Chemical composition of selected smithsonites (Sm) and cerussites (Cer) from UK (SEM-EDS) analysed for C-O isotope composition.
	Mendip Hill (Somerset)					Mendip Hills (Somerset)					Hilton Beck Appleby Westmoreland (Cumbria)					Hilton Mine (Cumbria)					Westmoreland (Cumbria)					Silvertop Quarry, Hallbankgate, Brampton (Cumbria)					Alston (Cumbria)
	BM.1985,Lud5931					East Harptree Mine					BM.1985,MI29836										Scordale Mine					BM.1990 114					BM.40181
wt.%	Sm	Sm	Sm	Sm	Sm	Sm	Sm	Sm	Sm	Sm	Sm	Sm	Sm	Sm	Sm	Sm	Sm	Sm	Sm	Sm	Sm	Sm	Sm	Sm	Sm	Sm	Sm	Sm	Sm	Sm	Sm	Sm	Sm	Sm	Sm
ZnO	63.754	62.8203	62.9323	64.2147	64.0155	63.8994	63.16	63.4139	62.2436	62.8163	62.82	63.3	58.6973	61.2824	57.0913	61.48	63.1857	62.4	62.97	61.87	63.04	63.1	62.4	62.99	61.75	63.51	62.54	63.01	64.21	63.1	63.91	62.32	58.64	42.9729	42.2379
CaO	0.448	1.442	0	0	0	0.658	0.97	0.78	1.414	0.672	0.99	0.9	0.532	0.434	0.476	0.768725	0.567602	1.07965	0.498755	0.805132	0.97	0.6	0.73	1.27	0.94	0.899105	1.29072	0.760527	0.140188	0.0260771	0.49	0	0	1.554	1.4
MgO	0	0	0	0	0	0	0	0	0	0	0	0	0	0	0	0	0.179223	0	0	0.247864	0	0	0	0	0	0	0.144879	0	0	0.120543	0	0	0	0	0
FeO	0.3483	0	0.83655	0	0	0	0	0	0	0	0	0	1.6254	1.3545	3.0573	0.262059	0	0	0	0.161817	0	0	0	0	1.81	0	0	0	0	0	0	0	4.76	18.4341	19.5951
MnO	0	0	0	0	0	0	0	0	0	0	0	0	0.6063	1.5093	2.9412	0	0	0	0	0	0	0	0.58	0	0	0	0	0	0	0	0	0	0	0.51648	0.439008
CdO	0	0.788187	0.902417	0.868148	0.890994	0	0	0	0	0	0	0	1.88	0	0	1.14163	0.87173	1.02654	0.962195	0.634861	0.97	0.78	0	0	0	0.193967	0	0.394322	0.508698	0.99327	0	0	0	0	0
CuO	0	0	0	0	0	0	0	0	0	0	0	0	0	0	0	0.578967	0	0	0	1.02345	0	0	0	0	0	0	0.274875	0.249388	0	0.231501	0	1.34	0	0	0
CO2*	35.0389	35.3708	34.8513	35.0205	34.9206	35.0689	34.914	34.9053	34.7669	34.4942	34.7458	34.9347	34.1736	35.2441	34.9422	34.7197	35.11	34.94	34.77	35.24	35.18	34.86	34.67	35.06	35.24	35.1141	35.1407	34.9416	35.0048	34.7409	34.94	34.44	34.62	36.0688	34.5915
Total	99.5892	100.421	99.5226	100.103	99.8271	99.6263	99.044	99.0991	98.4244	97.9825	98.5558	99.1347	97.5146	99.8244	98.508	98.9511	99.9143	99.4462	99.2009	99.9831	100.16	99.34	98.38	99.32	99.74	99.7171	99.3912	99.3558	99.8637	99.2123	99.34	98.1	98.02	99.5464	98.2635
	formula on the basis of 6 O
Zn	1.97	1.92	1.95	1.98	1.98	1.97	1.96	1.96	1.96	1.97	1.96	1.96	1.86	1.88	1.77	1.91501	1.94646	1.93136	1.95852	1.89867	1.94	1.96	1.95	1.94	1.9	1.95602	1.92469	1.9502	1.98375	1.96427	1.98	1.96	1.83	1.28848	1.2614
Ca	0.02	0.06	0	0	0	0.03	0.04	0.04	0.04	0.03	0.04	0.04	0.02	0.02	0.02	0.0347527	0.0253758	0.0485	0.0225144	0.0358605	0.04	0.03	0.03	0.06	0.04	0.0401904	0.0576521	0.0341637	0.00628601	0.00117818	0.02	0	0	0.0676257	0.0606786
Mg	0	0	0	0	0	0	0	0	0	0	0	0	0	0	0	0	0.0111482	0	0	0.0153602	0	0	0	0	0	0	0.01	0	0	0.01	0	0	0	0	0
Fe	0.01	0	0.06	0	0	0	0	0	0	0	0	0	0.06	0.05	0.11	0.00924695	0	0	0	0.00562544	0	0	0	0	0.06	0	0	0	0	0	0	0	0.17	0.626132	0.662884
Mn	0	0	0	0	0	0	0	0	0	0	0	0	0.02	0.05	0.1	0	0	0	0	0	0	0	0.02	0	0	0	0	0	0	0	0	0	0	0.0177675	0.0150415
Cd	0	0.02	0.02	0.02	0.02	0	0	0	0	0	0	0	0.04	0	0	0.0225389	0.0170195	0.0201383	0.0189682	0.0123486	0.02	0.02	0	0	0	0.00378641	0	0.00773554	0.00996125	0.0195979	0	0	0	0	0
Cu	0	0	0	0	0	0	0	0	0	0	0	0	0	0	0	0.018452	0	0	0	0.0321357	0	0	0	0	0	0	0.00865546	0.00789766	0	0.00737357	0	0.04	0	0	0
C	2	2	2	2	2	2	2	2	2	2	2	2	2	2	2	2	2	2	2	2	2	2	2	2	2	2	2	2	2	2	2	2	2	2	2
* Calcutated from stoichiometry
Table S2. (continued).
	Matlock (Derbyshire)					Cobbler Mine (Derbyshire)					Grinton Moor Swaledale (Yorkshire)					Halkyn mine Holywell Clwyd (Wales)					Mendips Merehead Quarry (Cumbria)					Roughtongill Caldbeck Fells (Cumbria)					Leadhills Strathclyde Region (Scotland)
	BM.61179										BM.1990 154					BM.69190										BM.35980					BM.1985 MI 24556
wt.%	Sm	Sm	Sm	Sm	Sm	Sm	Sm	Sm	Sm	Sm	Sm	Sm	Sm	Sm	Sm	Sm	Sm	Sm	Sm	Sm	Cer	Cer	Cer	Cer	Cer	Cer	Cer	Cer	Cer	Cer	Cer	Cer	Cer	Cer	Cer
ZnO	61.3	60.9227	62.3555	62.1	61.6883	60.41	60.0057	61.02	61.9	61.04	60.42	61.42	61.86	63.13	63.11	62.91	63.34	62.45	62.34	61.79	0.325235	0.856112	0.599443	0.28549	0.26	0	0	0	0.373386	0.53051	0.372935	0.821235	0.825638	1.15315	0.243875
CaO	1.35282	1.26217	0.849947	0.691836	1.34972	1.20849	1.88048	1.42625	1.42587	1.14852	1.4247	1.07954	0.12029	0.0950831	0.0614148	1.13	0.92	1.344	0.826	0.854	0.459581	0.344608	0	0.211805	0.38	0.2	0	0	0	0.34	0	0	0	0	0
MgO	0	0	0.131621	0.0571771	0.180432	0.671968	0.398017	0.269241	0.187487	0.751293	0.613498	0.248009	0.556653	0	0.25733	0	0	0	0	0	0	0	0	0	0	0	0.3	0	0	0	0	0	0	0	0
FeO	0	0.177212	0.220898	0	0.387643	1.56488	0.773186	0.0860024	0.556377	0.421582	0.490522	0.572881	0.333729	0.0614422	0.0255542	0	0	0	0	0	0	0	0	0	0	0	0	0	0	0	0	0	0.331247	0	0.723882
MnO	0	0	0	0	0	0.125982	0.0990865	0.280268	0	0	0	0	0	0	0	0	0	0	0	0	0	0	0	0	0	0.295774	0	0	0	0.39	0	0	0	0.449594	0
CdO	1.57964	1.94654	1.28629	1.69866	1.36289	0	0	0.50617	0	0.893663	0.66103	0.50256	0.106686	0.375193	0.544436	0	0	0	0	0	0.516654	0.116767	0.243083	0.27326	0.37	0	0	0	0	0	0	0	0.902328	0.254957	0
CuO	0	0	0	0	0	0	0	0.522499	0	0.43597	0.0986909	0	0.736566	0	0	0	0	0	0	0	0	0.3	0	0	0	0.3	0	0	0	0	0	0	0	0	0
PbO	0	0	0	0	0	0	0	0	0	0	1.33269	0.239659	0.33462	0.291379	0.638963	0	0	0	0	0	80.9	80.86	81.19	82.55	81.55	82.3	82.54	82.0896	83.1	82.0777	82.41	81.71	80.6724	80.74	81.6927
CO2*	34.75	34.7092	35.0426	34.7401	35.2327	35.3846	34.8926	35.098	35.136	35.5338	35.3035	34.9003	34.8665	34.4348	34.7831	34.9044	34.9721	34.8236	34.519	34.388	16.6653	16.8832	16.4163	16.6913	16.6455	16.7342	16.6026	16.1862	16.5874	16.9795	16.4511	16.56	16.8654	16.91	16.6833
Total	98.9825	99.0178	99.8868	99.2878	100.202	99.3659	98.0491	99.2084	99.2057	100.225	100.345	98.9629	98.915	98.3879	99.4208	98.9444	99.2321	98.6176	97.685	97.032	98.8668	99.3607	98.4488	100.012	99.2055	99.8299	99.4426	98.2758	100.061	100.318	99.234	99.0912	99.597	99.5077	99.3437
	formula on the basis of 6 O
Zn	1.90774	1.89823	1.92439	1.93318	1.89352	1.84632	1.85983	1.8802	1.90525	1.85774	1.85087	1.90324	1.91873	1.98267	1.9622	1.94919	1.95871	1.93942	1.95309	1.94323	0.0211056	0.054839	0.0394898	0.0184976	0.0168924	0	0	0	0.0243441	0.0337894	0.0245161	0.0532294	0.0529427	0.0737488	0.0158088
Ca	0.0611053	0.0570777	0.0380705	0.0312582	0.0601302	0.0536071	0.0845918	0.0637834	0.0636972	0.0507328	0.0632509	0.0481086	0.00534799	0.00428991	0.00275333	0.050815	0.0412914	0.0605786	0.0375591	0.0389802	0.0432855	0.0320379	0	0.0199177	0.0358328	0.0187594	0	0	0	0.0314301	0	0	0	0	0
Mg	0	0	0	0	0	0.0414727	0.0249113	0.0167528	0.0116533	0.0461738	0.0378959	0.0153776	0.0344335	0	0.0160514	0	0	0	0	0	0	0	0	0	0	0	0.0394614	0	0	0	0	0	0	0	0
Fe	0	0.00625497	0.00772273	0	0.0134791	0.0541804	0.0271473	0.00300195	0.0193996	0.014535	0.0169975	0.0199266	0.0115808	0.00216369	0.000894192	0	0	0	0	0	0	0	0	0	0	0	0	0	0	0	0	0	0.02	0	0.05
Mn	0	0	0.00466052	0.00204219	0.00635439	0.00441774	0.0035236	0.00990823	0	0	0	0	0	0	0	0	0	0	0	0	0	0	0	0	0	0.0219312	0	0	0	0.0284999	0	0	0	0.03	0
Cd	0.0311591	0.0384416	0.0251608	0.0335163	0.0265154	0	0	0.00988545	0	0.0172391	0.0128347	0.00987053	0.00209741	0.0074686	0.010729	0	0	0	0	0	0.0212505	0.00474078	0.0101499	0.011222	0.0152366	0	0	0	0	0	0	0	0.04	0.01	0
Cu	0	0	0	0	0	0	0	0.0164729	0	0.0135763	0.00308882	0	0.0230858	0	0	0	0	0	0	0	0	0.02	0	0	0	0.02	0	0	0	0	0	0	0	0	0
Pb	0	0	0	0	0	0	0	0	0	0	0.0148867	0.00270802	0.00378471	0.00333695	0.00724428	0	0	0	0	0	1.91436	1.88872	1.95036	1.95036	1.93204	1.93947	1.96054	2	1.97566	1.90628	1.97548	1.93123	1.88632	1.88293	1.93103
C	2	2	2	2	2	2	2	2	2	2	2	2	2	2	2	2	2	2	2	2	2	2	2	2	2	2	2	2	2	2	2	2	2	2	2
* Calcutated from stoichiometry
